# Supplementary material for: Evaluating and Quantifying User and Carer Involvement in Mental Health Care Planning (EQUIP): Co-Development of a New Patient-Reported Outcome Measure
Source: PLoS One. 2016 Mar 10;11(3):e0149973. doi: 10.1371/journal.pone.0149973 (PMC4786101; doi:10.1371/journal.pone.0149973)
Supplement: S1 Table — (XLSX) [file pone.0149973.s001.xlsx]

## Sheet: Sheet1
		n/%/mean(sd)
	Responses	402
	Gender	64% female
	Age	46(14)
	Service User	282
	Carer	88
	Both	29
	British	0.833
