# Supplementary material for: Evaluating and Quantifying User and Carer Involvement in Mental Health Care Planning (EQUIP): Co-Development of a New Patient-Reported Outcome Measure
Source: PLoS One. 2016 Mar 10;11(3):e0149973. doi: 10.1371/journal.pone.0149973 (PMC4786101; doi:10.1371/journal.pone.0149973)
Supplement: S2 Table — (XLSX) [file pone.0149973.s002.xlsx]

## Sheet: Sheet1
			Item Residual		Person Residual		Chi Square		Unidimensional T-Test		Reliability	Extreme Scores (%)
	Analysis ID	# of items	Mean	±SD	Mean	±SD	Value	p
	Initial	45	0.35	4.78	0.07	3.21	6622.15	< .001	0.26		0.97	1.24
	Rescore	45	0	3.29	-0.31	2.22	1392.86	< .001	0.1128		0.97	1.24
	Remove misfitting items	26	0.15	1.33	-0.45	1.95	163.79	0.02	0.0927		0.95	8.45
	Remove local dependency and DIF	14	0.36	1.35	-0.51	1.87	97.25	0.017	0.0376		0.93	11.94
	Final items	14	0.36	1.35	-0.51	1.87	97.25	0.017	0.0376		0.93	11.94
