# Supplementary material for: Evaluating and Quantifying User and Carer Involvement in Mental Health Care Planning (EQUIP): Co-Development of a New Patient-Reported Outcome Measure
Source: PLoS One. 2016 Mar 10;11(3):e0149973. doi: 10.1371/journal.pone.0149973 (PMC4786101; doi:10.1371/journal.pone.0149973)
Supplement: S3 Table — (XLSX) [file pone.0149973.s003.xlsx]

## Sheet: Sheet1
	Analysis ID		Item Residual		Person Residual		Chi Square		Unidimensional T-Test (% signficant)		Reliability	Extreme Scores (%)
		# of items	Mean	±SD	Mean	±SD	Value	p
	Initial	45	0.35	4.78	0.07	3.21	6622.15	< 0.001	0.26		0.97	5/402
	Rescore	45	0	3.29	-0.31	2.22	1392.86	< 0.001	0.1128		0.97	5/402
	Remove misfitting items	26	0.15	1.33	-0.45	1.95	163.79	0.02	0.0927		0.95	34/402
	Remove items with LD and DIF	14	0.36	1.35	-0.51	1.87	97.25	0.017	0.0376		0.93	48/402
	Final Items	14	0.36	1.35	-0.51	1.87	97.25	0.017	0.0376		0.93	48/402
	Ideal values	10 to 15*	0	<1.4	0	< 1.4		>0.01	< 5%		> .75	< 15 %
			3	58
			13	30
			12	37
			53	61
			34	48

## Sheet: Sheet2
							Category threshold location (θ)
Original item number	New item number	Statement	Item difficulty (b)	Fit Residual	Chi square	Chi square probability	Threshold 1	Threshold 2	Threshold 3	Threshold 4
3	1	The care plan has a clear objective	-0.342	2.049	6.222	0.285219	-1.54783	-0.478096	0.999648	NA
13	2	I am satisfied with the care plan	-0.012	-0.948	7.027	0.218628	-1.25117	0.219909	0.995489	NA
20	3	I am happy with all of the information on the care plan	0.333	-1.579	9.629	0.086469	-1.12421	0.476529	1.64605	NA
22	4	The contents of the care plan are what was agreed	0.197	1.636	1.165	0.948175	-0.738611	-0.256948	1.58738	NA
25	5	Care is received as it is described	0.147	1.924	8.302	0.140373	-1.25153	0.316764	1.37596	NA
27	6	The care plan is helpful	-0.002	-0.208	6.077	0.298833	-1.2361	-0.076354	1.30676	NA
30	7	My preferences for care are in the care plan	-0.259	2.129	7.839	0.165323	-1.74274	-1.2589	0.14	1.82734
31	8	The care plan is personalised.	-0.449	-0.338	8.756	0.119182	-1.57017	-0.410655	0.633673	NA
34	9	The care plan addresses important issues	-0.167	-1.794	7.855	0.16439	-1.69079	-0.242913	1.43379	NA
44	10	The care plan helps me to manage risk	0.526	-0.654	4.923	0.425315	-0.499659	0.377073	1.69949	NA
48	11	The information provided in the care plan is complete	0.262	-1	3.771	0.582866	-0.99576	0.662078	1.12035	NA
53	12	The care plan is worded in a respectful manner	-0.704	1.062	5.643	0.34254	-2.63748	-0.443472	0.968075	NA
58	13	Important decisions are explained to me	-0.157	1.04	8.429	0.134139	-1.18472	-0.383633	1.0976	NA
61	14	The care plan caters for all the important aspects of my life	0.626	0.896	8.76	0.119047	-0.532563	0.971275	1.44049	NA
