# Supplementary material for: Evaluating and Quantifying User and Carer Involvement in Mental Health Care Planning (EQUIP): Co-Development of a New Patient-Reported Outcome Measure
Source: PLoS One. 2016 Mar 10;11(3):e0149973. doi: 10.1371/journal.pone.0149973 (PMC4786101; doi:10.1371/journal.pone.0149973)
Supplement: S4 Table — (XLSX) [file pone.0149973.s004.xlsx]

## Sheet: Sheet1
	Raw Score	Theta	Interval score
	0	-4.472	0
	1	-3.646	4.02262
	2	-3.083	6.76443
	3	-2.7	8.62964
	4	-2.405	10.0663
	5	-2.162	11.2497
	6	-1.954	12.2627
	7	-1.769	13.1636
	8	-1.602	13.9769
	9	-1.448	14.7269
	10	-1.305	15.4233
	11	-1.171	16.0759
	12	-1.042	16.7041
	13	-0.92	17.2982
	14	-0.801	17.8778
	15	-0.687	18.433
	16	-0.575	18.9784
	17	-0.466	19.5092
	18	-0.358	20.0352
	19	-0.252	20.5514
	20	-0.147	21.0628
	21	-0.042	21.5741
	22	0.061	22.0757
	23	0.166	22.5871
	24	0.27	23.0935
	25	0.375	23.6049
	26	0.481	24.1211
	27	0.589	24.6471
	28	0.699	25.1828
	29	0.811	25.7282
	30	0.927	26.2931
	31	1.046	26.8727
	32	1.171	27.4814
	33	1.302	28.1194
	34	1.44	28.7914
	35	1.589	29.5171
	36	1.751	30.306
	37	1.929	31.1729
	38	2.131	32.1566
	39	2.365	33.2962
	40	2.65	34.6841
	41	3.02	36.486
	42	3.563	39.1305
	43	4.363	43.0265
